# Supplementary material for: Genome‐scale metabolic modelling of SARS‐CoV‐2 in cancer cells reveals an increased shift to glycolytic energy production
Source: PubMed Central journal article supplement (PMC8427129; doi:10.1002/1873-3468.14180), 2021-09-05
Supplement: FEB2-595-2350-s003.pdf [file FEB2-595-2350-s003.pdf]

**Supplementary Table 6: Common Liver Cancer Drugs and their Interactions**

| Drug                                             | Interactions                                                                                                                                                                                                                                                                                                                                                                                                                                                                                                                                                                                         |
|--------------------------------------------------|------------------------------------------------------------------------------------------------------------------------------------------------------------------------------------------------------------------------------------------------------------------------------------------------------------------------------------------------------------------------------------------------------------------------------------------------------------------------------------------------------------------------------------------------------------------------------------------------------|
| <p>Atezolizumab<br/>Tecentriq (Atezolizumab)</p> | <p>Bacillus Calmette-Guérin vaccine<br/>Betamethasone<br/>Deflazacort<br/>Dexamethasone<br/>Hydrocortisone<br/>Influenza vaccine (live)<br/>Measles, mumps and rubella vaccine, live<br/>Methylprednisolone<br/>Prednisolone<br/>Rotavirus vaccine<br/>Typhoid vaccine, oral<br/>Varicella-zoster vaccine<br/>Yellow fever vaccine, live</p>                                                                                                                                                                                                                                                         |
| <p>Avastin (Bevacizumab)<br/>Bevacizumab</p>     | <p>Acalabrutinib<br/>Aceclofenac<br/>Acenocoumarol<br/>Aldesleukin<br/>Alteplase<br/>Amsacrine<br/>Anagrelide<br/>Apixaban<br/>Argatroban<br/>Arsenic trioxide<br/>Asparaginase<br/>Aspirin<br/>Axitinib<br/>Azacitidine<br/>Azathioprine<br/>Bacillus Calmette-Guérin vaccine<br/>Belatacept<br/>Bendamustine<br/>Bexarotene<br/>Bivalirudin<br/>Bleomycin<br/>Bortezomib<br/>Bosutinib<br/>Bromfenac<br/>Busulfan<br/>Cabazitaxel<br/>Cabozantinib<br/>Cangrelor<br/>Capecitabine<br/>Caplacizumab<br/>Carboplatin<br/>Carfilzomib<br/>Carmustine<br/>Celecoxib<br/>Ceritinib<br/>Chlorambucil</p> |

|  |                       |
|--|-----------------------|
|  | Cilostazol            |
|  | Cisplatin             |
|  | Citalopram            |
|  | Cladribine            |
|  | Clofarabine           |
|  | Clopidogrel           |
|  | Cobimetinib           |
|  | Crisantaspase         |
|  | Cyclophosphamide      |
|  | Cytarabine            |
|  | Dabigatran            |
|  | Dacarbazine           |
|  | Dactinomycin          |
|  | Dalteparin            |
|  | Danaparoid            |
|  | Dapoxetine            |
|  | Dasatinib             |
|  | Daunorubicin          |
|  | Decitabine            |
|  | Dexketoprofen         |
|  | Diclofenac            |
|  | Dipyridamole          |
|  | Docetaxel             |
|  | Doxorubicin           |
|  | Duloxetine            |
|  | Edoxaban              |
|  | Enoxaparin            |
|  | Epirubicin            |
|  | Epoprostenol          |
|  | Eptifibatide          |
|  | Eribulin              |
|  | Escitalopram          |
|  | Estramustine          |
|  | Etodolac              |
|  | Etoposide             |
|  | Etoricoxib            |
|  | Fludarabine           |
|  | Fluorouracil          |
|  | Fluoxetine            |
|  | Flurbiprofen          |
|  | Fluvoxamine           |
|  | Fondaparinux          |
|  | Ganciclovir           |
|  | Gemcitabine           |
|  | Gemtuzumab ozogamicin |
|  | Heparin               |
|  | Hydroxycarbamide      |
|  | Ibrutinib             |
|  | Ibuprofen             |
|  | Idarubicin            |
|  | Ifosfamide            |

|  |                                                                                                                                                                                                                                                                                                                                                                                                                                                                                                                                                                                                                                                                                                                                                                                                                       |
|--|-----------------------------------------------------------------------------------------------------------------------------------------------------------------------------------------------------------------------------------------------------------------------------------------------------------------------------------------------------------------------------------------------------------------------------------------------------------------------------------------------------------------------------------------------------------------------------------------------------------------------------------------------------------------------------------------------------------------------------------------------------------------------------------------------------------------------|
|  | Iloprost<br>Imatinib<br>Indometacin<br>Influenza vaccine (live)<br>Inotersen<br>Irinotecan<br>Ketoprofen<br>Ketorolac<br>Leflunomide<br>Lenalidomide<br>Lenvatinib<br>Lomustine<br>Measles, mumps and rubella vaccine, live<br>Mefenamic acid<br>Meloxicam<br>Melphalan<br>Mercaptopurine<br>Methotrexate<br>Mifamurtide<br>Mitomycin<br>Mitotane<br>Mitoxantrone<br>Nabumetone<br>Naproxen<br>Nelarabine<br>Nicotinic acid<br>Nilotinib<br>Nintedanib<br>Niraparib<br>Olaparib<br>Omega-3-acid ethyl esters<br>Oxaliplatin<br>Paclitaxel<br>Palbociclib<br>Panobinostat<br>Parecoxib<br>Paroxetine<br>Pegaspargase<br>Peginterferon alfa<br>Pemetrexed<br>Pentostatin<br>Phenazone<br>Phenindione<br>Piroxicam<br>Pixantrone<br>Pomalidomide<br>Ponatinib<br>Prasugrel<br>Procarbazine<br>Raltitrexed<br>Regorafenib |
|--|-----------------------------------------------------------------------------------------------------------------------------------------------------------------------------------------------------------------------------------------------------------------------------------------------------------------------------------------------------------------------------------------------------------------------------------------------------------------------------------------------------------------------------------------------------------------------------------------------------------------------------------------------------------------------------------------------------------------------------------------------------------------------------------------------------------------------|

|                                                                       |                                                                                                                                                                                                                                                                                                                                                                                                                                                                                                                                                                                                                                                                                                                                                                                                                                                 |
|-----------------------------------------------------------------------|-------------------------------------------------------------------------------------------------------------------------------------------------------------------------------------------------------------------------------------------------------------------------------------------------------------------------------------------------------------------------------------------------------------------------------------------------------------------------------------------------------------------------------------------------------------------------------------------------------------------------------------------------------------------------------------------------------------------------------------------------------------------------------------------------------------------------------------------------|
|                                                                       | <p> Ribociclib<br/> Rivaroxaban<br/> Rotavirus vaccine<br/> Rucaparib<br/> Ruxolitinib<br/> Sertraline<br/> Sorafenib<br/> Streptokinase<br/> Streptozocin<br/> Sulfasalazine<br/> Sulindac<br/> Sunitinib<br/> Talazoparib<br/> Tegafur<br/> Temozolomide<br/> Temsirrolimus<br/> Tenecteplase<br/> Tenoxicam<br/> Thalidomide<br/> Thiotepa<br/> Tiaprofenic acid<br/> Ticagrelor<br/> Tinzaparin<br/> Tioguanine<br/> Tirofiban<br/> Tolfenamic acid<br/> Topotecan<br/> Trabectedin<br/> Trametinib<br/> Treasulfan<br/> Treprostinil<br/> Typhoid vaccine, oral<br/> Urokinase<br/> Valganciclovir<br/> Vandetanib<br/> Varicella-zoster vaccine<br/> Venlafaxine<br/> Vinblastine<br/> Vincristine<br/> Vindesine<br/> Vinflunine<br/> Vinorelbine<br/> Volanesorsen<br/> Vortioxetine<br/> Warfarin<br/> Yellow fever vaccine, live </p> |
| <p> Cabometyx (Cabozantinib-S-Malate)<br/> Cabozantinib-S-Malate </p> | <p> Acalabrutinib<br/> Aceclofenac<br/> Acenocoumarol </p>                                                                                                                                                                                                                                                                                                                                                                                                                                                                                                                                                                                                                                                                                                                                                                                      |

|  |                     |
|--|---------------------|
|  | Adalimumab          |
|  | Aldesleukin         |
|  | Alemtuzumab         |
|  | Alteplase           |
|  | Amifampridine       |
|  | Aminophylline       |
|  | Amiodarone          |
|  | Amisulpride         |
|  | Amphotericin B      |
|  | Amsacrine           |
|  | Anagrelide          |
|  | Apalutamide         |
|  | Apixaban            |
|  | Apomorphine         |
|  | Aprepitant          |
|  | Argatroban          |
|  | Arsenic trioxide    |
|  | Artemether          |
|  | Arteminol           |
|  | Asparaginase        |
|  | Aspirin             |
|  | Atazanavir          |
|  | Axitinib            |
|  | Azacididine         |
|  | Azathioprine        |
|  | Bambuterol          |
|  | Beclometasone       |
|  | Bedaquiline         |
|  | Belatacept          |
|  | Bendamustine        |
|  | Bendroflumethiazide |
|  | Betamethasone       |
|  | Bevacizumab         |
|  | Bexarotene          |
|  | Bivalirudin         |
|  | Bleomycin           |
|  | Blinatumomab        |
|  | Bortezomib          |
|  | Bosentan            |
|  | Bosutinib           |
|  | Brentuximab vedotin |
|  | Bromfenac           |
|  | Budesonide          |
|  | Bumetanide          |
|  | Busulfan            |
|  | Cabazitaxel         |
|  | Canakinumab         |
|  | Cangrelor           |
|  | Capecitabine        |
|  | Caplacizumab        |
|  | Carbamazepine       |

|  |                    |
|--|--------------------|
|  | Carboplatin        |
|  | Carfilzomib        |
|  | Carmustine         |
|  | Celecoxib          |
|  | Ceritinib          |
|  | Certolizumab pegol |
|  | Chlorambucil       |
|  | Chlorothiazide     |
|  | Chlorpromazine     |
|  | Chlortalidone      |
|  | Cilostazol         |
|  | Cisplatin          |
|  | Citalopram         |
|  | Cladribine         |
|  | Clarithromycin     |
|  | Clofarabine        |
|  | Clomipramine       |
|  | Clopidogrel        |
|  | Cobicistat         |
|  | Cobimetinib        |
|  | Crisantaspase      |
|  | Crizotinib         |
|  | Cyclophosphamide   |
|  | Cytarabine         |
|  | Dabigatran         |
|  | Dabrafenib         |
|  | Dacarbazine        |
|  | Dactinomycin       |
|  | Dalteparin         |
|  | Danaparoid         |
|  | Dapoxetine         |
|  | Daratumumab        |
|  | Darunavir          |
|  | Dasatinib          |
|  | Daunorubicin       |
|  | Decitabine         |
|  | Deflazacort        |
|  | Delamanid          |
|  | Desflurane         |
|  | Dexamethasone      |
|  | Dexketoprofen      |
|  | Dexrazoxane        |
|  | Diclofenac         |
|  | Diltiazem          |
|  | Dinutuximab        |
|  | Dipyridamole       |
|  | Disopyramide       |
|  | Docetaxel          |
|  | Domperidone        |
|  | Doxorubicin        |
|  | Dronedarone        |

|  |                       |
|--|-----------------------|
|  | Droperidol            |
|  | Duloxetine            |
|  | Edoxaban              |
|  | Efavirenz             |
|  | Encorafenib           |
|  | Enoxaparin            |
|  | Entrectinib           |
|  | Enzalutamide          |
|  | Epirubicin            |
|  | Epoprostenol          |
|  | Eptifibatide          |
|  | Eribulin              |
|  | Erythromycin          |
|  | Escitalopram          |
|  | Estramustine          |
|  | Etodolac              |
|  | Etoposide             |
|  | Etoricoxib            |
|  | Fingolimod            |
|  | Flecainide            |
|  | Fluconazole           |
|  | Fludarabine           |
|  | Fludrocortisone       |
|  | Fluorouracil          |
|  | Fluoxetine            |
|  | Flurbiprofen          |
|  | Fluvoxamine           |
|  | Fondaparinux          |
|  | Formoterol            |
|  | Fosamprenavir         |
|  | Fosphenytoin          |
|  | Furosemide            |
|  | Ganciclovir           |
|  | Gemcitabine           |
|  | Gemtuzumab ozogamicin |
|  | Glasdegib             |
|  | Golimumab             |
|  | Granisetron           |
|  | Grapefruit            |
|  | Haloperidol           |
|  | Heparin               |
|  | Hydrochlorothiazide   |
|  | Hydrocortisone        |
|  | Hydroflumethiazide    |
|  | Hydroxycarbamide      |
|  | Hydroxyzine           |
|  | Ibrutinib             |
|  | Ibuprofen             |
|  | Idarubicin            |
|  | Idelalisib            |
|  | Ifosfamide            |

Iloprost  
Imatinib  
Indacaterol  
Indapamide  
Indometacin  
Infliximab  
Inotersen  
Inotuzumab ozogamicin  
Ipilimumab  
Irinotecan  
Isavuconazole  
Isoflurane  
Itraconazole  
Ivabradine  
Ketoconazole  
Ketoprofen  
Ketorolac  
Lapatinib  
Leflunomide  
Lenalidomide  
Lenvatinib  
Letermovir  
Levomepromazine  
Lithium  
Lofexidine  
Lomustine  
Lopinavir  
Mefenamic acid  
Mefloquine  
Meloxicam  
Melphalan  
Mercaptopurine  
Methadone  
Methotrexate  
Methylprednisolone  
Metolazone  
Midazolam  
Mitomycin  
Mitotane  
Mitoxantrone  
Mizolastine  
Mogamulizumab  
Moxifloxacin  
Nabumetone  
Naproxen  
Nelarabine  
Netupitant  
Nevirapine  
Nicotinic acid  
Nilotinib  
Nintedanib



|  |                           |
|--|---------------------------|
|  | Niraparib                 |
|  | Nivolumab                 |
|  | Obinutuzumab              |
|  | Olaparib                  |
|  | Olodaterol                |
|  | Omega-3-acid ethyl esters |
|  | Ondansetron               |
|  | Osimertinib               |
|  | Oxaliplatin               |
|  | Ozanimod                  |
|  | Paclitaxel                |
|  | Palbociclib               |
|  | Paliperidone              |
|  | Palonosetron              |
|  | Panobinostat              |
|  | Parecoxib                 |
|  | Paroxetine                |
|  | Pasireotide               |
|  | Pazopanib                 |
|  | Pegaspargase              |
|  | Peginterferon alfa        |
|  | Pembrolizumab             |
|  | Pemetrexed                |
|  | Pentamidine               |
|  | Pentostatin               |
|  | Phenazone                 |
|  | Phenindione               |
|  | Phenobarbital             |
|  | Phenytoin                 |
|  | Pimozide                  |
|  | Piroxicam                 |
|  | Pixantrone                |
|  | Pomalidomide              |
|  | Ponatinib                 |
|  | Posaconazole              |
|  | Prasugrel                 |
|  | Prednisolone              |
|  | Primidone                 |
|  | Procarbazine              |
|  | Quinine                   |
|  | Raltitrexed               |
|  | Ramucirumab               |
|  | Ranolazine                |
|  | Regorafenib               |
|  | Ribociclib                |
|  | Rifampicin                |
|  | Risperidone               |
|  | Ritonavir                 |
|  | Rituximab                 |
|  | Rivaroxaban               |
|  | Rucaparib                 |

|  |                        |
|--|------------------------|
|  | Ruxolitinib            |
|  | Salbutamol             |
|  | Salmeterol             |
|  | Sertraline             |
|  | Sevoflurane            |
|  | Sildenafil             |
|  | Siponimod              |
|  | Sorafenib              |
|  | Sotalol                |
|  | St John's wort         |
|  | Streptokinase          |
|  | Streptozocin           |
|  | Sulfasalazine          |
|  | Sulindac               |
|  | Sulpiride              |
|  | Sunitinib              |
|  | Talazoparib            |
|  | Tegafur                |
|  | Telavancin             |
|  | Temozolomide           |
|  | Temsirolimus           |
|  | Tenecteplase           |
|  | Tenoxicam              |
|  | Terbutaline            |
|  | Tetrabenazine          |
|  | Thalidomide            |
|  | Theophylline           |
|  | Thiotepa               |
|  | Tiaprofenic acid       |
|  | Ticagrelor             |
|  | Tinzaparin             |
|  | Tioguanine             |
|  | Tipranavir             |
|  | Tirofiban              |
|  | Tizanidine             |
|  | Tolfenamic acid        |
|  | Tolterodine            |
|  | Topotecan              |
|  | Torasemide             |
|  | Toremifene             |
|  | Trabectedin            |
|  | Trametinib             |
|  | Trastuzumab            |
|  | Trastuzumab deruxtecan |
|  | Trastuzumab emtansine  |
|  | Treosulfan             |
|  | Treprostinil           |
|  | Triamcinolone          |
|  | Urokinase              |
|  | Valganciclovir         |
|  | Vandetanib             |

|                                      |                                                                                                                                                                                                                                                                                                                                                                                                                                                                                                                              |
|--------------------------------------|------------------------------------------------------------------------------------------------------------------------------------------------------------------------------------------------------------------------------------------------------------------------------------------------------------------------------------------------------------------------------------------------------------------------------------------------------------------------------------------------------------------------------|
|                                      | Vardenafil<br>Vemurafenib<br>Venlafaxine<br>Verapamil<br>Vernakalant<br>Vilanterol<br>Vinblastine<br>Vincristine<br>Vindesine<br>Vinflunine<br>Vinorelbine<br>Volanesorsen<br>Voriconazole<br>Vortioxetine<br>Warfarin<br>Xipamide<br>Zuclopenthixol                                                                                                                                                                                                                                                                         |
| Cynamza (Ramucirumab)<br>Ramucirumab | Aldesleukin<br>Amsacrine<br>Arsenic trioxide<br>Asparaginase<br>Axitinib<br>Azacitidine<br>Azathioprine<br>Bacillus Calmette-Guérin vaccine<br>Belatacept<br>Bendamustine<br>Bexarotene<br>Bleomycin<br>Bortezomib<br>Bosutinib<br>Busulfan<br>Cabazitaxel<br>Cabozantinib<br>Capecitabine<br>Carboplatin<br>Carfilzomib<br>Carmustine<br>Ceritinib<br>Chlorambucil<br>Cisplatin<br>Cladribine<br>Clofarabine<br>Crisantaspase<br>Cyclophosphamide<br>Cytarabine<br>Dacarbazine<br>Dactinomycin<br>Dasatinib<br>Daunorubicin |

|  |                                          |
|--|------------------------------------------|
|  | Decitabine                               |
|  | Dexrazoxane                              |
|  | Docetaxel                                |
|  | Doxorubicin                              |
|  | Epirubicin                               |
|  | Eribulin                                 |
|  | Estramustine                             |
|  | Etoposide                                |
|  | Fludarabine                              |
|  | Fluorouracil                             |
|  | Ganciclovir                              |
|  | Gemcitabine                              |
|  | Gemtuzumab ozogamicin                    |
|  | Hydroxycarbamide                         |
|  | Ibrutinib                                |
|  | Idarubicin                               |
|  | Ifosfamide                               |
|  | Imatinib                                 |
|  | Influenza vaccine (live)                 |
|  | Irinotecan                               |
|  | Leflunomide                              |
|  | Lenalidomide                             |
|  | Lomustine                                |
|  | Measles, mumps and rubella vaccine, live |
|  | Melphalan                                |
|  | Mercaptopurine                           |
|  | Methotrexate                             |
|  | Mifamurtide                              |
|  | Mitomycin                                |
|  | Mitotane                                 |
|  | Mitoxantrone                             |
|  | Nelarabine                               |
|  | Nilotinib                                |
|  | Niraparib                                |
|  | Olaparib                                 |
|  | Oxaliplatin                              |
|  | Paclitaxel                               |
|  | Palbociclib                              |
|  | Panobinostat                             |
|  | Pegaspargase                             |
|  | Peginterferon alfa                       |
|  | Pemetrexed                               |
|  | Pentostatin                              |
|  | Pixantrone                               |
|  | Pomalidomide                             |
|  | Procarbazine                             |
|  | Raltitrexed                              |
|  | Regorafenib                              |
|  | Ribociclib                               |
|  | Rotavirus vaccine                        |
|  | Rucaparib                                |

|                                           |                                                                                                                                                                                                                                                                                                                                                                                                                 |
|-------------------------------------------|-----------------------------------------------------------------------------------------------------------------------------------------------------------------------------------------------------------------------------------------------------------------------------------------------------------------------------------------------------------------------------------------------------------------|
|                                           | Ruxolitinib<br>Sorafenib<br>Streptozocin<br>Sulfasalazine<br>Sunitinib<br>Talazoparib<br>Tegafur<br>Temozolomide<br>Temsilolimus<br>Thalidomide<br>Thiotepa<br>Tioguanine<br>Topotecan<br>Trabectedin<br>Treosulfan<br>Typhoid vaccine, oral<br>Valganciclovir<br>Varicella-zoster vaccine<br>Vinblastine<br>Vincristine<br>Vindesine<br>Vinflunine<br>Vinorelbine<br>Yellow fever vaccine, live                |
| Keytruda (Pembrolizumab)<br>Pembrolizumab | Aldesleukin<br>Amsacrine<br>Arsenic trioxide<br>Asparaginase<br>Axitinib<br>Azacitidine<br>Azathioprine<br>Bacillus Calmette-Guérin vaccine<br>Belatacept<br>Bendamustine<br>Betamethasone<br>Bexarotene<br>Bleomycin<br>Bortezomib<br>Bosutinib<br>Busulfan<br>Cabazitaxel<br>Cabozantinib<br>Capecitabine<br>Carboplatin<br>Carfilzomib<br>Carmustine<br>Ceritinib<br>Chlorambucil<br>Cisplatin<br>Cladribine |

|  |                                          |
|--|------------------------------------------|
|  | Clofarabine                              |
|  | Crisantaspase                            |
|  | Cyclophosphamid                          |
|  | Cytarabine                               |
|  | Dacarbazine                              |
|  | Dactinomycin                             |
|  | Dasatinib                                |
|  | Daunorubicin                             |
|  | Decitabine                               |
|  | Deflazacort                              |
|  | Dexamethasone                            |
|  | Dexrazoxane                              |
|  | Docetaxel                                |
|  | Doxorubicin                              |
|  | Epirubicin                               |
|  | Eribulin                                 |
|  | Estramustine                             |
|  | Etoposide                                |
|  | Fludarabine                              |
|  | Fluorouracil                             |
|  | Ganciclovir                              |
|  | Gemcitabine                              |
|  | Gemtuzumab ozogamicin                    |
|  | Hydrocortisone                           |
|  | Hydroxycarbamide                         |
|  | Ibrutinib                                |
|  | Idarubicin                               |
|  | Ifosfamide                               |
|  | Imatinib                                 |
|  | Influenza vaccine (live)                 |
|  | Irinotecan                               |
|  | Leflunomide                              |
|  | Lenalidomide                             |
|  | Lomustine                                |
|  | Measles, mumps and rubella vaccine, live |
|  | Melphalan                                |
|  | Mercaptopurine                           |
|  | Methotrexate                             |
|  | Methylprednisolone                       |
|  | Mifamurtide                              |
|  | Mitomycin                                |
|  | Mitotane                                 |
|  | Mitoxantrone                             |
|  | Nelarabine                               |
|  | Nilotinib                                |
|  | Niraparib                                |
|  | Olaparib                                 |
|  | Oxaliplatin                              |
|  | Paclitaxel                               |
|  | Palbociclib                              |
|  | Panobinostat                             |

|                                                      |                                                                                                                                                                                                                                                                                                                                                                                                                                                                                                                                                                                                                 |
|------------------------------------------------------|-----------------------------------------------------------------------------------------------------------------------------------------------------------------------------------------------------------------------------------------------------------------------------------------------------------------------------------------------------------------------------------------------------------------------------------------------------------------------------------------------------------------------------------------------------------------------------------------------------------------|
|                                                      | Pegaspargase<br>Peginterferon alfa<br>Pemetrexed<br>Pentostatin<br>Pixantrone<br>Pomalidomide<br>Prednisolone<br>Procarbazine<br>Raltitrexed<br>Regorafenib<br>Ribociclib<br>Rotavirus vaccine<br>Rucaparib<br>Ruxolitinib<br>Sorafenib<br>Streptozocin<br>Sulfasalazine<br>Sunitinib<br>Talazoparib<br>Tegafur<br>Temozolomide<br>Temsilolimus<br>Thalidomide<br>Thiotepa<br>Tioguanine<br>Topotecan<br>Trabectedin<br>Treosulfan<br>Typhoid vaccine, oral<br>Valganciclovir<br>Varicella-zoster vaccine<br>Vinblastine<br>Vincristine<br>Vindesine<br>Vinflunine<br>Vinorelbine<br>Yellow fever vaccine, live |
| Lenvatinib Mesylate<br>Lenvima (Lenvatinib Mesylate) | Acalabrutinib<br>Aceclofenac<br>Acenocoumarol<br>Alteplase<br>Amifampridine<br>Aminophylline<br>Amiodarone<br>Amisulpride<br>AmphotericinB<br>Anagrelide<br>Apalutamide<br>Apixaban<br>Apomorphine<br>Argatroban                                                                                                                                                                                                                                                                                                                                                                                                |

|  |                     |
|--|---------------------|
|  | Arsenictrioxide     |
|  | Artemether          |
|  | Artemimol           |
|  | Aspirin             |
|  | Axitinib            |
|  | Bambuterol          |
|  | Beclometasone       |
|  | Bedaquiline         |
|  | Bendroflumethiazide |
|  | Betamethasone       |
|  | Bevacizumab         |
|  | Bivalirudin         |
|  | Bosutinib           |
|  | Bromfenac           |
|  | Budesonide          |
|  | Bumetanide          |
|  | Cabozantinib        |
|  | Cangrelor           |
|  | Caplacizumab        |
|  | Celecoxib           |
|  | Ceritinib           |
|  | Chlorothiazide      |
|  | Chlorpromazine      |
|  | Chlortalidone       |
|  | Cilostazol          |
|  | Citalopram          |
|  | Clarithromycin      |
|  | Clomipramine        |
|  | Clopidogrel         |
|  | Cobimetinib         |
|  | Crizotinib          |
|  | Dabigatran          |
|  | Dalteparin          |
|  | Danaparoid          |
|  | Dapoxetine          |
|  | Dasatinib           |
|  | Deflazacort         |
|  | Delamanid           |
|  | Desflurane          |
|  | Dexamethasone       |
|  | Dexketoprofen       |
|  | Diclofenac          |
|  | Dipyridamole        |
|  | Disopyramide        |
|  | Domperidone         |
|  | Dronedarone         |
|  | Droperidol          |
|  | Duloxetine          |
|  | Edoxaban            |
|  | Efavirenz           |
|  | Encorafenib         |



|  |                      |
|--|----------------------|
|  | Enoxaparin           |
|  | Entrectinib          |
|  | Epoprostenol         |
|  | Eptifibatide         |
|  | Eribulin             |
|  | Erythromycin         |
|  | Escitalopram         |
|  | Etodolac             |
|  | Etoricoxib           |
|  | Fingolimod           |
|  | Flecainide           |
|  | Fluconazole          |
|  | Fludrocortisone      |
|  | Fluoxetine           |
|  | Flurbiprofen         |
|  | Fluvoxamine          |
|  | Fondaparinux         |
|  | Formoterol           |
|  | Furosemide           |
|  | Glasdegib            |
|  | Granisetron          |
|  | Haloperidol          |
|  | Heparin              |
|  | Hydrochlorothiazide  |
|  | Hydrocortisone       |
|  | Hydroflumethiazide   |
|  | Hydroxyzine          |
|  | Ibrutinib            |
|  | Ibuprofen            |
|  | Iloprost             |
|  | Indacaterol          |
|  | Indapamide           |
|  | Indometacin          |
|  | Inotersen            |
|  | Inotuzumabozogamicin |
|  | Isoflurane           |
|  | Ivabradine           |
|  | Ketoprofen           |
|  | Ketorolac            |
|  | Lapatinib            |
|  | Levomepromazine      |
|  | Lithium              |
|  | Lofexidine           |
|  | Mefenamicacid        |
|  | Mefloquine           |
|  | Meloxicam            |
|  | Methadone            |
|  | Methylprednisolone   |
|  | Metolazone           |
|  | Mizolastine          |
|  | Moxifloxacin         |

|  |                        |
|--|------------------------|
|  | Nabumetone             |
|  | Naproxen               |
|  | Nicotinicacid          |
|  | Nilotinib              |
|  | Nintedanib             |
|  | Olodaterol             |
|  | Omega--acidethylesters |
|  | Ondansetron            |
|  | Osimertinib            |
|  | Ozanimod               |
|  | Paliperidone           |
|  | Palonosetron           |
|  | Panobinostat           |
|  | Parecoxib              |
|  | Paroxetine             |
|  | Pasireotide            |
|  | Pazopanib              |
|  | Pentamidine            |
|  | Phenazone              |
|  | Phenindione            |
|  | Pimozide               |
|  | Piroxicam              |
|  | Ponatinib              |
|  | Prasugrel              |
|  | Prednisolone           |
|  | Quinine                |
|  | Ranolazine             |
|  | Regorafenib            |
|  | Ribociclib             |
|  | Risperidone            |
|  | Rivaroxaban            |
|  | Ruxolitinib            |
|  | Salbutamol             |
|  | Salmeterol             |
|  | Sertraline             |
|  | Sevoflurane            |
|  | Sildenafil             |
|  | Siponimod              |
|  | Sorafenib              |
|  | Sotalol                |
|  | Streptokinase          |
|  | Sulindac               |
|  | Sulpiride              |
|  | Sunitinib              |
|  | Telavancin             |
|  | Tenecteplase           |
|  | Tenoxicam              |
|  | Terbutaline            |
|  | Tetrabenazine          |
|  | Theophylline           |
|  | Tiaprofenicacid        |

|                                                    |                                                                                                                                                                                                                                                                                                                                                                                                     |
|----------------------------------------------------|-----------------------------------------------------------------------------------------------------------------------------------------------------------------------------------------------------------------------------------------------------------------------------------------------------------------------------------------------------------------------------------------------------|
|                                                    | Ticagrelor<br>Tinzaparin<br>Tirofiban<br>Tizanidine<br>Tolfenamicacid<br>Tolterodine<br>Torasemide<br>Toremifene<br>Trametinib<br>Trastuzumabemtansine<br>Treprostinil<br>Triamcinolone<br>Urokinase<br>Vandetanib<br>Vardenafil<br>Vemurafenib<br>Venlafaxine<br>Vernakalant<br>Vilanterol<br>Vinflunine<br>Volanesorsen<br>Voriconazole<br>Vortioxetine<br>Warfarin<br>Xipamide<br>Zuclopenthixol |
| Nexavar (Sorafenib Tosylate)<br>Sorafenib Tosylate | Acenocoumarol<br>Adalimumab<br>Aldesleukin<br>Alemtuzumab<br>Amifampridine<br>Aminophylline<br>Amiodarone<br>Amisulpride<br>Amphotericin B<br>Amsacrine<br>Anagrelide<br>Apalutamide<br>Apomorphine<br>Arsenic trioxide<br>Artemether<br>Artenimol<br>Asparaginase<br>Axitinib<br>Azacitidine<br>Azathioprine<br>Bambuterol<br>Beclometasone<br>Bedaquiline<br>Belatacept<br>Bendamustine           |

|  |                     |
|--|---------------------|
|  | Bendroflumethiazide |
|  | Betamethasone       |
|  | Bevacizumab         |
|  | Bexarotene          |
|  | Bleomycin           |
|  | Blinatumomab        |
|  | Bortezomib          |
|  | Bosentan            |
|  | Bosutinib           |
|  | Brentuximab vedotin |
|  | Budesonide          |
|  | Bumetanide          |
|  | Busulfan            |
|  | Cabazitaxel         |
|  | Cabozantinib        |
|  | Canakinumab         |
|  | Capecitabine        |
|  | Carbamazepine       |
|  | Carboplatin         |
|  | Carfilzomib         |
|  | Carmustine          |
|  | Ceritinib           |
|  | Certolizumab pegol  |
|  | Chlorambucil        |
|  | Chlorothiazide      |
|  | Chlorpromazine      |
|  | Chlortalidone       |
|  | Cisplatin           |
|  | Citalopram          |
|  | Cladribine          |
|  | Clarithromycin      |
|  | Clofarabine         |
|  | Clomipramine        |
|  | Crisantaspase       |
|  | Crizotinib          |
|  | Cyclophosphamide    |
|  | Cytarabine          |
|  | Dabrafenib          |
|  | Dacarbazine         |
|  | Dactinomycin        |
|  | Daratumumab         |
|  | Dasatinib           |
|  | Daunorubicin        |
|  | Decitabine          |
|  | Deflazacort         |
|  | Delamanid           |
|  | Desflurane          |
|  | Dexamethasone       |
|  | Dexrazoxane         |
|  | Dinutuximab         |
|  | Disopyramide        |

|  |                       |
|--|-----------------------|
|  | Docetaxel             |
|  | Domperidone           |
|  | Doxorubicin           |
|  | Dronedarone           |
|  | Droperidol            |
|  | Efavirenz             |
|  | Encorafenib           |
|  | Entrectinib           |
|  | Enzalutamide          |
|  | Epirubicin            |
|  | Eribulin              |
|  | Erythromycin          |
|  | Escitalopram          |
|  | Eslicarbazepine       |
|  | Estramustine          |
|  | Etoposide             |
|  | Fingolimod            |
|  | Flecainide            |
|  | Fluconazole           |
|  | Fludarabine           |
|  | Fludrocortisone       |
|  | Fluorouracil          |
|  | Formoterol            |
|  | Fosphenytoin          |
|  | Furosemide            |
|  | Ganciclovir           |
|  | Gemcitabine           |
|  | Gemtuzumab ozogamicin |
|  | Glasdegib             |
|  | Golimumab             |
|  | Granisetron           |
|  | Haloperidol           |
|  | Hydrochlorothiazide   |
|  | Hydrocortisone        |
|  | Hydroflumethiazide    |
|  | Hydroxycarbamide      |
|  | Hydroxyzine           |
|  | Ibrutinib             |
|  | Idarubicin            |
|  | Ifosfamide            |
|  | Imatinib              |
|  | Indacaterol           |
|  | Indapamide            |
|  | Infliximab            |
|  | Inotuzumab ozogamicin |
|  | Ipilimumab            |
|  | Irinotecan            |
|  | Isoflurane            |
|  | Ivabradine            |
|  | Lapatinib             |
|  | Leflunomide           |

|  |                    |
|--|--------------------|
|  | Lenalidomide       |
|  | Lenvatinib         |
|  | Levomepromazine    |
|  | Lithium            |
|  | Lofexidine         |
|  | Lomustine          |
|  | Mefloquine         |
|  | Melphalan          |
|  | Mercaptopurine     |
|  | Methadone          |
|  | Methotrexate       |
|  | Methylprednisolone |
|  | Metolazone         |
|  | Mifamurtide        |
|  | Mitomycin          |
|  | Mitotane           |
|  | Mitoxantrone       |
|  | Mizolastine        |
|  | Mogamulizumab      |
|  | Moxifloxacin       |
|  | Nelarabine         |
|  | Neomycin           |
|  | Nevirapine         |
|  | Nilotinib          |
|  | Niraparib          |
|  | Nivolumab          |
|  | Obinutuzumab       |
|  | Olaparib           |
|  | Olodaterol         |
|  | Ondansetron        |
|  | Osimertinib        |
|  | Oxaliplatin        |
|  | Oxcarbazepine      |
|  | Ozanimod           |
|  | Paclitaxel         |
|  | Palbociclib        |
|  | Paliperidone       |
|  | Palonosetron       |
|  | Panobinostat       |
|  | Pasireotide        |
|  | Pazopanib          |
|  | Pegaspargase       |
|  | Peginterferon alfa |
|  | Pembrolizumab      |
|  | Pemetrexed         |
|  | Pentamidine        |
|  | Pentostatin        |
|  | Phenindione        |
|  | Phenobarbital      |
|  | Phenytoin          |
|  | Pimozide           |

|  |                        |
|--|------------------------|
|  | Pixantrone             |
|  | Pomalidomide           |
|  | Prednisolone           |
|  | Primidone              |
|  | Procarbazine           |
|  | Quinine                |
|  | Raltitrexed            |
|  | Ramucirumab            |
|  | Ranolazine             |
|  | Regorafenib            |
|  | Ribociclib             |
|  | Rifampicin             |
|  | Risperidone            |
|  | Rituximab              |
|  | Rucaparib              |
|  | Ruxolitinib            |
|  | Salbutamol             |
|  | Salmeterol             |
|  | Sevoflurane            |
|  | Sildenafil             |
|  | Siponimod              |
|  | Sotalol                |
|  | St John's wort         |
|  | Streptozocin           |
|  | Sulfasalazine          |
|  | Sulpiride              |
|  | Sunitinib              |
|  | Talazoparib            |
|  | Tegafur                |
|  | Telavancin             |
|  | Temozolomide           |
|  | Temsirolimus           |
|  | Terbutaline            |
|  | Tetrabenazine          |
|  | Thalidomide            |
|  | Theophylline           |
|  | Thiotepa               |
|  | Tioguanine             |
|  | Tizanidine             |
|  | Tolterodine            |
|  | Topotecan              |
|  | Torasemide             |
|  | Toremifene             |
|  | Trabectedin            |
|  | Trastuzumab            |
|  | Trastuzumab deruxtecan |
|  | Trastuzumab emtansine  |
|  | Treosulfan             |
|  | Triamcinolone          |
|  | Valganciclovir         |
|  | Vandetanib             |

|                                          |                                                                                                                                                                                                                                                                                                                                                                                                                                                                                                                                                                                                                                                                            |
|------------------------------------------|----------------------------------------------------------------------------------------------------------------------------------------------------------------------------------------------------------------------------------------------------------------------------------------------------------------------------------------------------------------------------------------------------------------------------------------------------------------------------------------------------------------------------------------------------------------------------------------------------------------------------------------------------------------------------|
|                                          | <p>Vardenafil<br/> Vemurafenib<br/> Venlafaxine<br/> Vernakalant<br/> Vilanterol<br/> Vinblastine<br/> Vincristine<br/> Vindesine<br/> Vinflunine<br/> Vinorelbine<br/> Voriconazole<br/> Warfarin<br/> Xipamide<br/> Zuclopenthixol</p>                                                                                                                                                                                                                                                                                                                                                                                                                                   |
| <p>Nivolumab<br/> Opdivo (Nivolumab)</p> | <p>Aldesleukin<br/> Amsacrine<br/> Arsenic trioxide<br/> Asparaginase<br/> Axitinib<br/> Azacitidine<br/> Azathioprine<br/> Bacillus Calmette-Guérin vaccine<br/> Belatacept<br/> Bendamustine<br/> Betamethasone<br/> Bexarotene<br/> Bleomycin<br/> Bortezomib<br/> Bosutinib<br/> Busulfan<br/> Cabazitaxel<br/> Cabozantinib<br/> Capecitabine<br/> Carboplatin<br/> Carfilzomib<br/> Carmustine<br/> Ceritinib<br/> Chlorambucil<br/> Cisplatin<br/> Cladribine<br/> Clofarabine<br/> Crisantaspase<br/> Cyclophosphamide<br/> Cytarabine<br/> Dacarbazine<br/> Dactinomycin<br/> Dasatinib<br/> Daunorubicin<br/> Decitabine<br/> Deflazacort<br/> Dexamethasone</p> |



|  |                                          |
|--|------------------------------------------|
|  | Dexrazoxane                              |
|  | Docetaxel                                |
|  | Doxorubicin                              |
|  | Epirubicin                               |
|  | Eribulin                                 |
|  | Estramustine                             |
|  | Etoposide                                |
|  | Fludarabine                              |
|  | Fluorouracil                             |
|  | Ganciclovir                              |
|  | Gemcitabine                              |
|  | Gemtuzumab ozogamicin                    |
|  | Hydrocortisone                           |
|  | Hydroxycarbamide                         |
|  | Ibrutinib                                |
|  | Idarubicin                               |
|  | Ifosfamide                               |
|  | Imatinib                                 |
|  | Influenza vaccine (live)                 |
|  | Irinotecan                               |
|  | Leflunomide                              |
|  | Lenalidomide                             |
|  | Lomustine                                |
|  | Measles, mumps and rubella vaccine, live |
|  | Melphalan                                |
|  | Mercaptopurine                           |
|  | Methotrexate                             |
|  | Methylprednisolone                       |
|  | Mifamurtide                              |
|  | Mitomycin                                |
|  | Mitotane                                 |
|  | Mitoxantrone                             |
|  | Nelarabine                               |
|  | Nilotinib                                |
|  | Niraparib                                |
|  | Olaparib                                 |
|  | Oxaliplatin                              |
|  | Paclitaxel                               |
|  | Palbociclib                              |
|  | Panobinostat                             |
|  | Pegaspargase                             |
|  | Peginterferon alfa                       |
|  | Pemetrexed                               |
|  | Pentostatin                              |
|  | Pixantrone                               |
|  | Pomalidomide                             |
|  | Prednisolone                             |
|  | Procarbazine                             |
|  | Raltitrexed                              |
|  | Regorafenib                              |
|  | Ribociclib                               |

|                                                  |                                                                                                                                                                                                                                                                                                                                                                                                                                                                                                 |
|--------------------------------------------------|-------------------------------------------------------------------------------------------------------------------------------------------------------------------------------------------------------------------------------------------------------------------------------------------------------------------------------------------------------------------------------------------------------------------------------------------------------------------------------------------------|
|                                                  | <p> Rotavirus vaccine<br/> Rucaparib<br/> Ruxolitinib<br/> Sorafenib<br/> Streptozocin<br/> Sulfasalazine<br/> Sunitinib<br/> Talazoparib<br/> Tegafur<br/> Temozolomide<br/> Temsirrolimus<br/> Thalidomide<br/> Thiotepa<br/> Tioguanine<br/> Topotecan<br/> Trabectedin<br/> Treo sulfan<br/> Typhoid vaccine, oral<br/> Valganciclovir<br/> Varicella-zoster vaccine<br/> Vinblastine<br/> Vincristine<br/> Vindesine<br/> Vinflunine<br/> Vinorelbine<br/> Yellow fever vaccine, live </p> |
| <p> Regorafenib<br/> Stivarga (Regorafenib) </p> | <p> Acalabrutinib<br/> Aceclofenac<br/> Acenocoumarol<br/> Adalimumab<br/> Aldesleukin<br/> Alemtuzumab<br/> Alteplase<br/> Amsacrine<br/> Anagrelide<br/> Apalutamide<br/> Apixaban<br/> Aprepitant<br/> Argatroban<br/> Arsenic trioxide<br/> Asparaginase<br/> Aspirin<br/> Atazanavir<br/> Atorvastatin<br/> Axitinib<br/> Azacitidine<br/> Azathioprine<br/> Belatacept<br/> Bendamustine<br/> Bevacizumab<br/> Bexarotene </p>                                                            |

Bivalirudin  
Bleomycin  
Blinatumomab  
Bortezomib  
Bosentan  
Bosutinib  
Brentuximabvedotin  
Bromfenac  
Busulfan  
Cabazitaxel  
Cabozantinib  
Canakinumab  
Cangrelor  
Capecitabine  
Caplacizumab  
Carbamazepine  
Carboplatin  
Carfilzomib  
Carmustine

Celecoxib

Ceritinib  
Certolizumabpegol  
Chlorambucil  
Cilostazol  
Cisplatin  
Citalopram  
Cladribine  
Clarithromycin  
Clofarabine  
Clopidogrel  
Cobicistat  
Cobimetinib  
Crisantaspase  
Crizotinib  
Cyclophosphamide  
Cytarabine  
Dabigatran  
Dabrafenib  
Dacarbazine  
Dactinomycin  
Dalteparin  
Danaparoid  
Dapoxetine  
Daratumumab  
Darunavir  
Dasatinib  
Daunorubicin

|  |                      |
|--|----------------------|
|  | Decitabine           |
|  | Dexketoprofen        |
|  | Dexrazoxane          |
|  | Diclofenac           |
|  | Diltiazem            |
|  | Dinutuximab          |
|  | Dipyridamole         |
|  | Docetaxel            |
|  | Doxorubicin          |
|  | Dronedarone          |
|  | Duloxetine           |
|  | Edoxaban             |
|  | Efavirenz            |
|  | Enoxaparin           |
|  | Enzalutamide         |
|  | Epirubicin           |
|  | Epoprostenol         |
|  | Eptifibatide         |
|  | Eribulin             |
|  | Erythromycin         |
|  | Escitalopram         |
|  | Estramustine         |
|  | Etodolac             |
|  | Etoposide            |
|  | Etoricoxib           |
|  | Fluconazole          |
|  | Fludarabine          |
|  | Fluorouracil         |
|  | Fluoxetine           |
|  | Flurbiprofen         |
|  | Fluvastatin          |
|  | Fluvoxamine          |
|  | Fondaparinux         |
|  | Fosamprenavir        |
|  | Fosphenytoin         |
|  | Ganciclovir          |
|  | Gemcitabine          |
|  | Gemtuzumabozogamicin |
|  | Golimumab            |
|  | Grapefruit           |
|  | Heparin              |
|  | Hydroxycarbamide     |
|  | Ibrutinib            |
|  | Ibuprofen            |
|  | Idarubicin           |
|  | Idelalisib           |
|  | Ifosfamide           |
|  | Iloprost             |
|  | Imatinib             |
|  | Indometacin          |
|  | Infliximab           |

|                        |
|------------------------|
| Inotersen              |
| Inotuzumabozogamicin   |
| Ipilimumab             |
| Irinotecan             |
| Isavuconazole          |
| Itraconazole           |
| Ketoconazole           |
| Ketoprofen             |
| Ketorolac              |
| Leflunomide            |
| Lenalidomide           |
| Lenvatinib             |
| Letermovir             |
| Lomustine              |
| Lopinavir              |
| Mefenamicacid          |
| Meloxicam              |
| Melphalan              |
| Mercaptopurine         |
| Methotrexate           |
| Mifamurtide            |
| Mitomycin              |
| Mitotane               |
| Mitoxantrone           |
| Mogamulizumab          |
| Nabumetone             |
| Naproxen               |
| Nelarabine             |
| Netupitant             |
| Nevirapine             |
| Nicotinicacid          |
| Nilotinib              |
| Nintedanib             |
| Niraparib              |
| Nivolumab              |
| Obinutuzumab           |
| Olaparib               |
| Omega--acidethylesters |
| Oxaliplatin            |
| Paclitaxel             |
| Palbociclib            |
| Panobinostat           |
| Parecoxib              |
| Paroxetine             |
| Pegaspargase           |
| Peginterferonalfa      |
| Pembrolizumab          |
| Pemetrexed             |
| Pentostatin            |
| Phenazone              |
| Phenindione            |

|  |                       |
|--|-----------------------|
|  | Phenobarbital         |
|  | Phenytoin             |
|  | Piroxicam             |
|  | Pixantrone            |
|  | Pomalidomide          |
|  | Ponatinib             |
|  | Posaconazole          |
|  | Prasugrel             |
|  | Primidone             |
|  | Procarbazine          |
|  | Raltitrexed           |
|  | Ramucirumab           |
|  | Ribociclib            |
|  | Rifampicin            |
|  | Ritonavir             |
|  | Rituximab             |
|  | Rivaroxaban           |
|  | Rosuvastatin          |
|  | Rucaparib             |
|  | Ruxolitinib           |
|  | Sertraline            |
|  | Sorafenib             |
|  | StJohn'swort          |
|  | Streptokinase         |
|  | Streptozocin          |
|  | Sulfasalazine         |
|  | Sulindac              |
|  | Sunitinib             |
|  | Talazoparib           |
|  | Tegafur               |
|  | Temozolomide          |
|  | Temsirolimus          |
|  | Tenecteplase          |
|  | Tenoxicam             |
|  | Thalidomide           |
|  | Thiotepa              |
|  | Tiaprofenicacid       |
|  | Ticagrelor            |
|  | Tinzaparin            |
|  | Tioguanine            |
|  | Tipranavir            |
|  | Tirofiban             |
|  | Tolfenamicacid        |
|  | Topotecan             |
|  | Trabectedin           |
|  | Trametinib            |
|  | Trastuzumab           |
|  | Trastuzumabderuxtecan |
|  | Trastuzumabemtansine  |
|  | Treosulfan            |
|  | Treprostinil          |

|  |                                                                                                                                                                                                         |
|--|---------------------------------------------------------------------------------------------------------------------------------------------------------------------------------------------------------|
|  | Urokinase<br>Valganciclovir<br>Vandetanib<br>Venlafaxine<br>Verapamil<br>Vinblasti<br>Vincristine<br>Vindesine<br>Vinflunine<br>Vinorelbine<br>Volanesorsen<br>Voriconazole<br>Vortioxetine<br>Warfarin |
|--|---------------------------------------------------------------------------------------------------------------------------------------------------------------------------------------------------------|
